# Supplementary material for: Allosteric autoregulation of DNA binding via a DNA-mimicking protein domain: a biophysical study of ZNF410–DNA interaction using small angle X-ray scattering
Source: PubMed Central journal article supplement — Nucleic Acids Res. 2023 Jan 20;51(4):1674–86. doi: 10.1093/nar/gkac1274 (PMC9976917; doi:10.1093/nar/gkac1274), 2023-01-20
Supplement: gkac1274_supplemental_file.pdf [file gkac1274_supplemental_file.pdf]

## Supplementary Information

### **Allosteric autoregulation of DNA binding via a DNA-mimicking protein domain: a biophysical study of ZNF410-DNA interaction using small angle X-ray scattering**

Gundeep Kaur<sup>1,8</sup>, Ren Ren<sup>1,8</sup>, Michal Hammel<sup>2</sup>, John R. Horton<sup>1</sup>, Jie Yang<sup>1</sup>, Yu Cao<sup>1</sup>, Chenxi He<sup>3</sup>, Fei Lan<sup>3</sup>, Xianjiang Lan<sup>4,5</sup>, Gerd A. Blobel<sup>5,6</sup>, Robert M. Blumenthal<sup>7</sup>, Xing Zhang<sup>1,\*</sup>, and Xiaodong Cheng<sup>1,\*</sup>

<sup>1</sup>Department of Epigenetics and Molecular Carcinogenesis, University of Texas MD Anderson Cancer Center, Houston, TX 77030, USA; <sup>2</sup>Molecular Biophysics and Integrated Bioimaging, Lawrence Berkeley National Laboratory, Berkeley, California, USA; <sup>3</sup>Shanghai Key Laboratory of Medical Epigenetics, International Laboratory of Medical Epigenetics and Metabolism, Ministry of Science and Technology, Institutes of Biomedical Sciences, Fudan University and Key Laboratory of Carcinogenesis and Cancer Invasion, Ministry of Education, Liver Cancer Institute, Zhongshan Hospital, Fudan University, Shanghai, 200032, China; <sup>4</sup>Department of Systems Biology for Medicine, School of Basic Medical Sciences; Department of Liver Surgery and Transplantation, Liver Cancer Institute, Zhongshan Hospital, Fudan University, Shanghai 200032, China; <sup>5</sup>Division of Hematology, the Children's Hospital of Philadelphia, Philadelphia, PA 19104, USA; <sup>6</sup>Perelman School of Medicine, University of Pennsylvania, Philadelphia, PA 19104, USA; <sup>7</sup>Department of Medical Microbiology and Immunology, and Program in Bioinformatics, The University of Toledo College of Medicine and Life Sciences, Toledo, OH 43614, USA

<sup>8</sup>These authors contributed equally to this work.

\*Correspondence: XZhan21@mdanderson.org; XCheng5@mdanderson.org

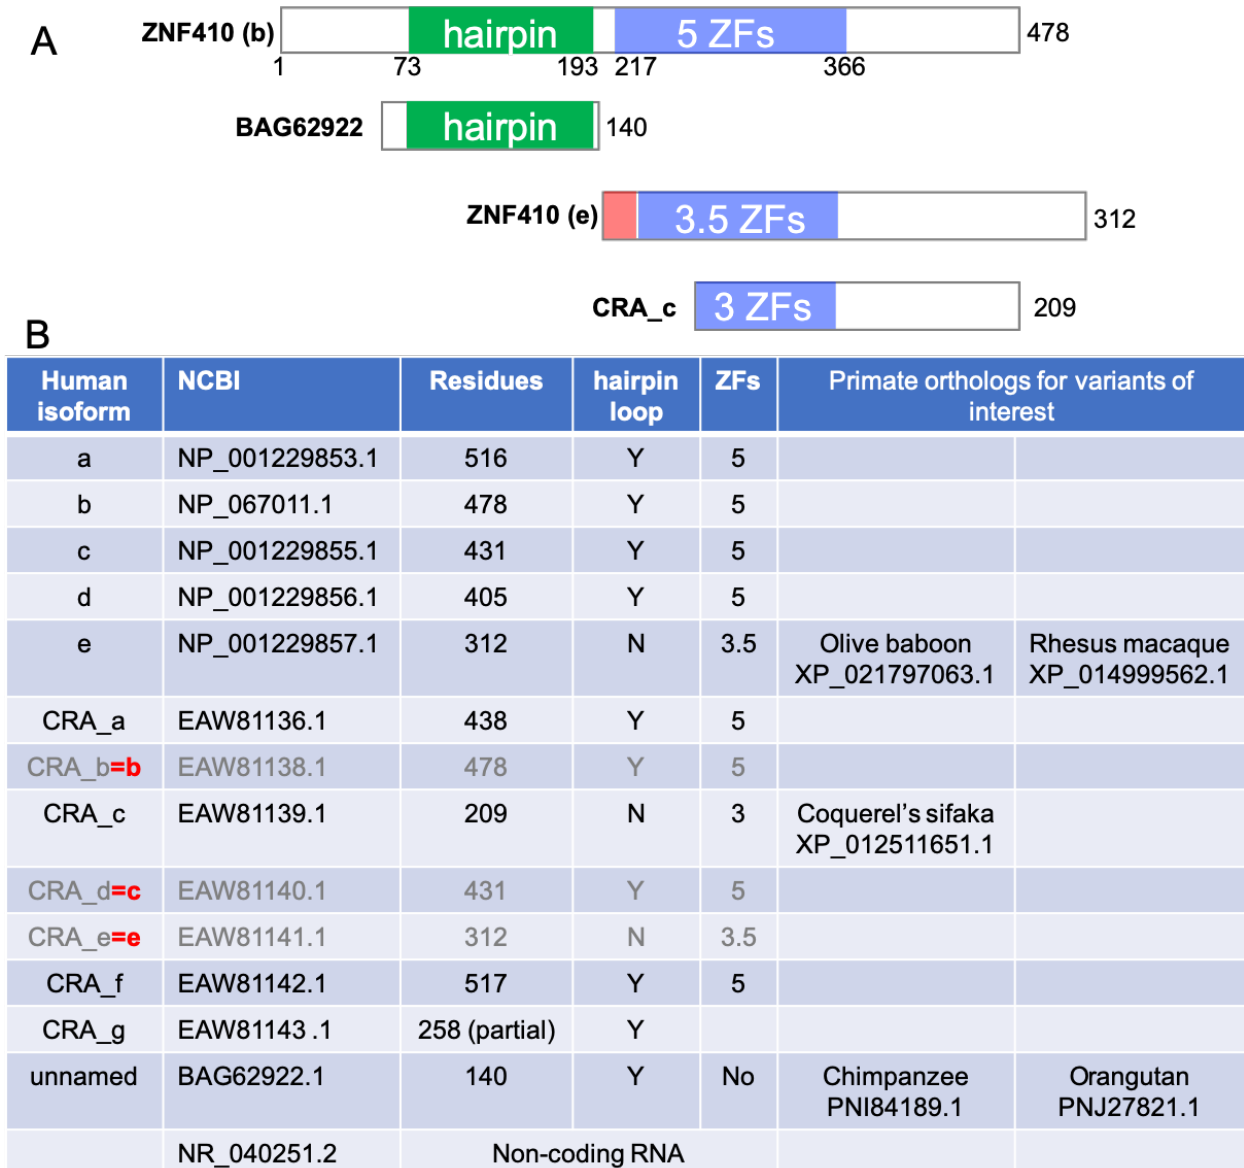

**Figure S1.** There are at least nine distinct isoforms for human ZNF410. **(A)** Cartoons of selected isoforms. **(B)** Three are particularly noteworthy, each of them is present in at least one other primate species. The unnamed isoform (BAG62922.1) begins at an internal methionine, but ends before any of the ZNFs. The other two are just the reverse – isoform e (NP\_001229857 or EAW81141) is substituted for ZF1 and the first cysteine of ZF2, and CRA\_c (EAW81139) begins just ahead of ZNF3.

| Common name               | Species                         | Clade          | ZNF410 Ortholog | Cover | Identity (%) | Length (aa) |
|---------------------------|---------------------------------|----------------|-----------------|-------|--------------|-------------|
| Human (isoform a)         | <i>Homo sapiens</i>             | Primate        | NP_001229853.1  | (100) | (100)        | 516         |
| Rhesus macaque            | <i>Macaca mulatta</i>           | Primate        | XP_014999559.2  | 93    | 95.67        | 478         |
| Angolan colobus           | <i>Colobus angolensis</i>       | Primate        | XP_011804978.1  | 98    | 90.20        | 506         |
| Common marmoset           | <i>Callithrix jacchus</i>       | Primate        | XP_002754185.2  | 93    | 95.46        | 478         |
| Malayan flying lemur      | <i>Galeopterus variegatus</i>   | Dermoptera     | XP_008565230.1  | 93    | 92.99        | 478         |
| Mouse                     | <i>Mus musculus</i>             | Glire          | NP_659082.1     | 93    | 93.40        | 478         |
| American beaver           | <i>Castor canadensis</i>        | Glire          | XP_020022334.1  | 93    | 93.20        | 478         |
| Guinea pig (cavy)         | <i>Cavia porcellus</i>          | Glire          | XP_003472457.1  | 93    | 93.20        | 478         |
| European rabbit           | <i>Oryctolagus cuniculus</i>    | Glire          | XP_002719703.1  | 93    | 95.05        | 478         |
| Arabian camel (dromedary) | <i>Camelus dromedarius</i>      | Laurasiatheria | XP_010974834.2  | 93    | 92.99        | 478         |
| Sperm whale               | <i>Physeter catodon</i>         | Laurasiatheria | XP_007109074.1  | 93    | 92.99        | 472         |
| Cow                       | <i>Bos taurus</i>               | Laurasiatheria | NP_001338875.1  | 93    | 92.37        | 478         |
| Goat                      | <i>Capra hircus</i>             | Laurasiatheria | XP_005686117.1  | 93    | 92.37        | 478         |
| Horse                     | <i>Equus caballus</i>           | Laurasiatheria | XP_001490078.2  | 93    | 92.37        | 478         |
| Cat                       | <i>Felis catus</i>              | Laurasiatheria | XP_003987863.1  | 93    | 91.55        | 478         |
| Dog                       | <i>Canis lupus familiaris</i>   | Laurasiatheria | XP_022277914.1  | 93    | 91.96        | 478         |
| Polar Bear                | <i>Ursus maritimus</i>          | Laurasiatheria | XP_008698131.1  | 93    | 91.96        | 479         |
| Chinese pangolin          | <i>Manis pentadactyla</i>       | Laurasiatheria | XP_036769129.1  | 93    | 91.96        | 477         |
| Large flying fox          | <i>Pteropus vampyrus</i>        | Laurasiatheria | XP_023392808.1  | 93    | 91.98        | 479         |
| Common vampire bat        | <i>Desmodus rotundus</i>        | Laurasiatheria | XP_024423383.1  | 93    | 90.52        | 478         |
| Star-nosed mole           | <i>Condylura cristata</i>       | Laurasiatheria | XP_004682125.1  | 93    | 88.87        | 459         |
| Elephant                  | <i>Loxodonta africana</i>       | Afrotheria     | XP_003408805.1  | 93    | 85.83        | 490         |
| Armadillo                 | <i>Dasypus novemcinctus</i>     | Xenarthra      | XP_012379386.1  | 92    | 83.0         | 468         |
| Koala                     | <i>Phascolarctos cinereus</i>   | Metatheria     | XP_020841968.1  | 93    | 78.17        | 499         |
| Platypus                  | <i>Ornithorhynchus anatinus</i> | Monotremata    | XP_028931293.1  | 92    | 72.88        | 467         |

**Figure S2.** Phylogeny of ZNF410 among 25 diverse mammals, chosen based (1).

1. Hecker, N. and Hiller, M. (2020) A genome alignment of 120 mammals highlights ultraconserved element variability and placenta-associated enhancers. *Gigascience*, **9**, giz159.

| (A)<br>Vertebrate orthologs                                                                          | Mammalia            | Aves                 | Reptilia                   | Amphibia                  | Osteichthyes                |
|------------------------------------------------------------------------------------------------------|---------------------|----------------------|----------------------------|---------------------------|-----------------------------|
|                                                                                                      | <i>Homo sapiens</i> | <i>Gallus gallus</i> | <i>Anolis carolinensis</i> | <i>Xenopus tropicalis</i> | <i>Lepisosteus oculatus</i> |
|                                                                                                      | NP_001229855.1      | NP_001006480.2       | XP_003214434.1             | NP_001072669.1            | XP_015205560.1              |
|                                                                                                      | human               | chicken              | green anole lizard         | western clawed frog       | shortnose gar               |
| Cover (%)                                                                                            | (100)               | 87                   | 98                         | 98                        | 98                          |
| E value                                                                                              | (0.0)               | 0.0                  | 0.0                        | 2e-151                    | 2e-142                      |
| Identity (%)                                                                                         | (100)               | 86                   | 69                         | 63                        | 58                          |
| Length (aa)                                                                                          | 431 (isoform c)     | 445                  | 467                        | 403                       | 448                         |
| <b>(B) Substitutions relative to human ortholog</b>                                                  |                     |                      |                            |                           |                             |
| Hairpin loop                                                                                         | (60 aa)             | 6                    | 8                          | 11                        | 18                          |
| ZFs                                                                                                  | (115 aa)            | 4                    | 7                          | 21                        | 20                          |
| <b>(C) Number of ZNF410 binding sites within 1 KB of CHD4 promoter (all in the same orientation)</b> |                     |                      |                            |                           |                             |
|                                                                                                      | 11                  | 9                    | 10                         | 11                        | 4                           |

(D)

|                 |                                                                      |              |
|-----------------|----------------------------------------------------------------------|--------------|
|                 |                                                                      | *** ** * * * |
| H. sapiens      | GLGSSAEHLVVFQDEAEDSGNDFLSSESTDSSTPWFLRVQELAHDSLIAATRAQLAKNAKTSSNGE   |              |
| G. gallus       | GLGSPAEHLVVFQDEVEDSGNDFLSHDSTDSSTPWFLRVQELAHDSLIAATRAQLAKNAKASNNGE   |              |
| A. carolinensis | GLGSLSEHLVVFQDEAEDSGNDFLSNNSSTDSSTPWFLRVQELAHDSLIAATRAQLAKNAKASNNGE  |              |
| X. tropicalis   | GLTSPSEHLVVFQDEAEDSGNDFLSNDCTDSNTPWYLRVQELAHDSLIAATRAQLAKSVKTSSVGE   |              |
| L. oculatus     | GLAASAEPLVVFVEDEVD---NDISTGSESADGSTPWYLRVQELAHDSLIAATRAQLAKDAKASNSGD | *** * * * *  |

**Figure S3.** (A) Summary of five vertebrate ZNF10 orthologs. (B) Number of substitutions within the hairpin loop and ZF region are listed. (C) Number of ZNF410 binding sites within 1 KB 5' to CHD4 promoters are listed. (D) Sequence alignment of the corresponding hairpin loop. Acidic residues in proposed DNA-mimicking segments of human (top) and gar (bottom) orthologs are indicated with red asterisks.

(A) AlphaFold model of Bos Taurus ZNF410

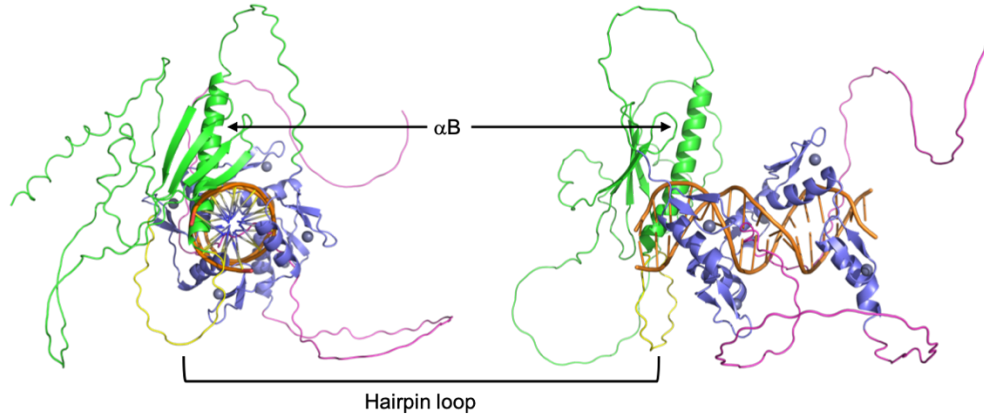

(B) AlphaFold model of mouse ZNF410

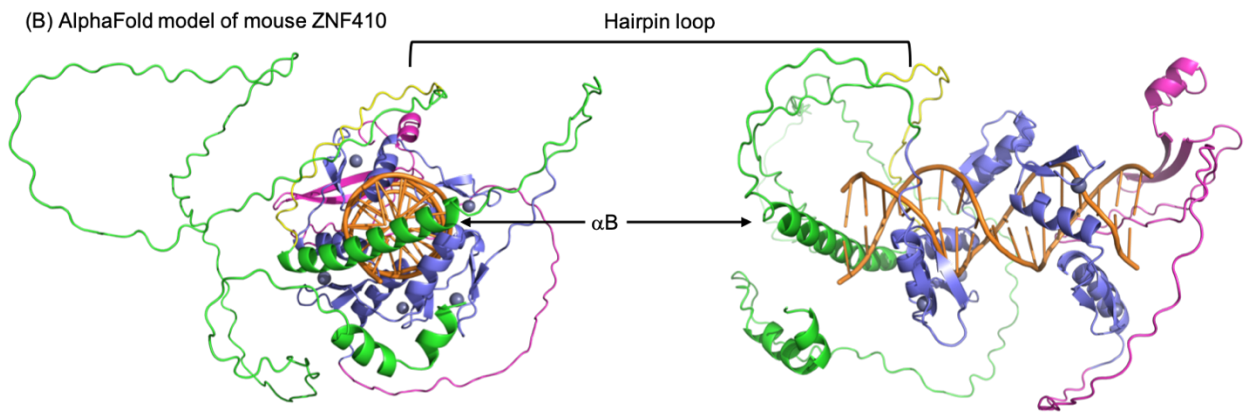

**Figure S4.** Two orthogonal views of AlphaFold predictions of (A) *Bos taurus* and (B) mouse ZNF410 orthologs. The predicted corresponding long  $\alpha B$  helix blocks the DNA binding.

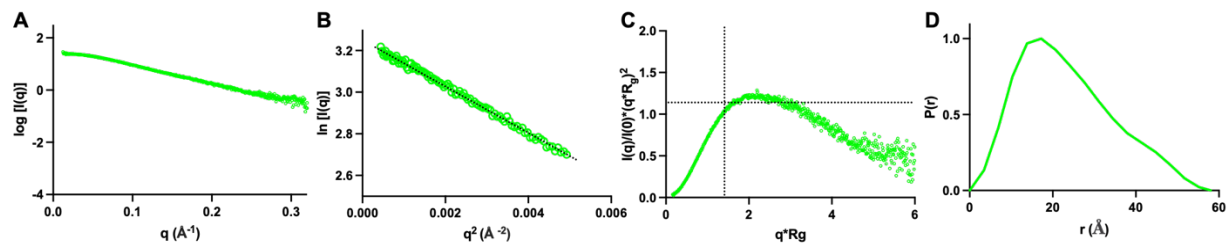

**Figure S5.** SAXS curves/profile for 17 bp DNA using in our experiments. **(A)** Scattering intensity profile. **(B)** Guinier plot. **(C)** Kratky plot. **(D)** P(r) plot.

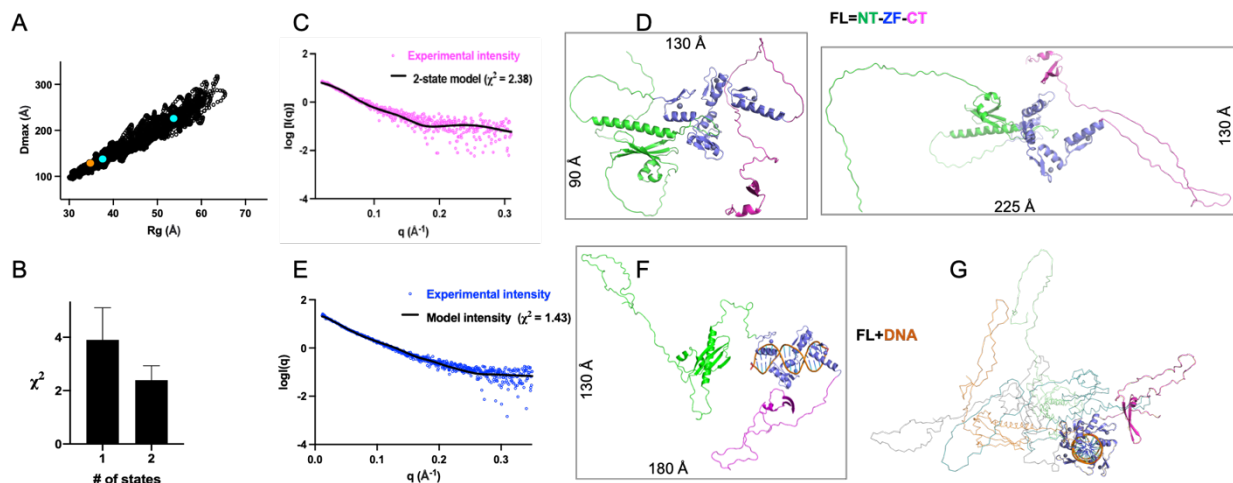

**Figure S6. ZNF410 FL exists in compact and extended conformations.** (A) Plot of  $R_g$  vs.  $D_{max}$  values for all 10,000 models obtained in BILBOMD conformational sampling. The initial AlphaFold model is shown as an orange dot. (B) MULTIFOXS analysis suggests ZNF410 FL has the probability to adopt two conformational states (the two blue dots in panel A). (C) Fitting of experimental X-ray scattering profile (magenta dots) to the calculated scattering (black line) of 2-state models. (D) Examples of models representing two states of ZNF410 FL (compact and extended). (E) The fitting of experimental X-ray scattering profile (blue dots) to the calculated scattering (black line) of the fitting model in the presence of DNA. (F) One example of a DNA bound ZNF410 model. (G) A sampling of DNA bound ZNF410 models with varied conformations of NT and CT.

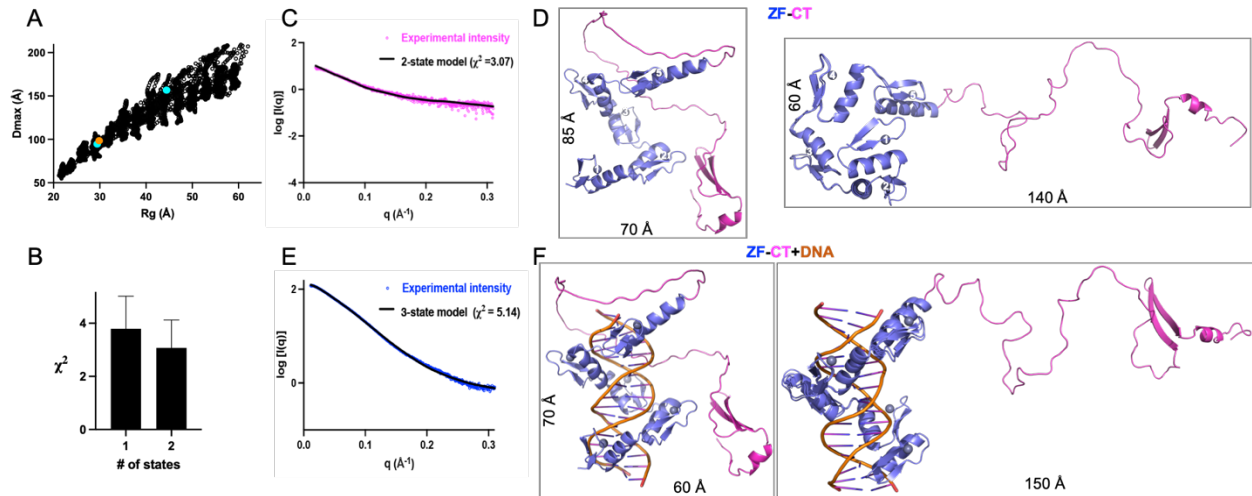

**Figure S7. ZF-CT exists as mixture of compact and extended conformations.** (A) Plot of Rg vs. Dmax values for all 10,000 models obtained in BILBOMD conformational sampling. The starting AlphaFold model is shown as an orange dot. (B) MULTIFOXS analysis suggests ZF-CT has the probability to adopt (at least) two conformational states (two blue dots in panel A). (C) Fitting of experimental scattering profile (magenta dots) to the calculated scattering (black line) of a two-model ensemble. (D) Examples of models represent two states of ZF-CT in the absence of DNA (compact and extended). (E-F) The fitting of experimental X-ray scattering profile (blue dots) to the calculated scattering (black line) from the multi-model states in the presence of DNA (panel F).



**Table S1.** Expression constructs and DNA primers used in this study

| Residues | name                                                                                | pXC# |                                                                                                                                                                                                                                                                                                                                                                                                           |  |
|----------|-------------------------------------------------------------------------------------|------|-----------------------------------------------------------------------------------------------------------------------------------------------------------------------------------------------------------------------------------------------------------------------------------------------------------------------------------------------------------------------------------------------------------|--|
| 1-478    | FL                                                                                  | 2179 |                                                                                                                                                                                                                                                                                                                                                                                                           |  |
| 1-366    | NT-ZF                                                                               | 2218 |                                                                                                                                                                                                                                                                                                                                                                                                           |  |
| 1-216    | NT                                                                                  | 2288 |                                                                                                                                                                                                                                                                                                                                                                                                           |  |
| 217-366  | ZF                                                                                  | 2180 |                                                                                                                                                                                                                                                                                                                                                                                                           |  |
| 217-478  | ZF-CT                                                                               | 2217 |                                                                                                                                                                                                                                                                                                                                                                                                           |  |
|          |                                                                                     |      |                                                                                                                                                                                                                                                                                                                                                                                                           |  |
|          | mutant                                                                              |      | Primers used in the mutagenesis                                                                                                                                                                                                                                                                                                                                                                           |  |
| 1-478    | S148D                                                                               | 2330 | 5' -CAGAAGAT <u>GAT</u> GGGAATGATTTCCCTC-3'<br>3' -TCCTACTCCGTCTTCTACTACCCTTACT-5'<br>(the underlined codon is the intended mutation)                                                                                                                                                                                                                                                                     |  |
| 1-478    | S/T-D/E:<br><br>(S148D/<br>S154D/<br>S155D/<br>S157D/<br>T158E/<br>S160D/<br>S161D) | 2319 | (1) (5' -TGTTCAGGGGCCCTGGGATCCATGTTATCAG<br>ATGAGTTAGAAT-3') and the pertinent<br>mutagenic reverse primer (5' -CATGGAATGTC<br><u>ATCGTCTTCGTCCTCATCGTCGAGGAAATCATTTCCCATC</u> -3')<br>(2) (5' -ATTTCCCTCGACGATGAGGACGAAGACGATGACATT<br>CCATGGTTCCCTCCGG-3') and the 3' reverse<br>primer (5' -TCAGTCACGATGCGGCCGCTCGAGTCATGT<br>CCGTCTTTCAGTTAA-3')<br>The underlined codons are the intended mutations. |  |
| 1-478    | D/E-A:<br><br>(D143A/<br>E144A/<br>E146A/<br>D147A)                                 | 2341 | (1) 5' -TTGTACAGGCTGCGGCAGCAGCTTCAGGGAATGATT<br>TC-3' and the pertinent mutagenic reverse<br>primer (5' -CATGGAATGTCATCGTCTTCGTCCTCATCGTC<br><u>GAGGAAATCATTTCCCATC</u> -3')<br>(2) 5' -TTCCCTGAAGCTGCTGCCGAGCCTGTACAAACACT<br>AA-3' and the 3' reverse primer (5' -TCAGTCA<br>CGATGCGGCCGCTCGAGTCATGTCCGTCTTTCAGTTAA-3')<br>The underlined codons are the intended mutations.                            |  |
| 1-366    | S/T-D/E                                                                             | 2312 | Same as pXC2319                                                                                                                                                                                                                                                                                                                                                                                           |  |
| 1-366    | D/E-A                                                                               | 2342 | Same as pXC2341                                                                                                                                                                                                                                                                                                                                                                                           |  |
